# Supplementary material for: The effect of confinement on the electrohydrodynamic behavior of droplets in a microfluidic oil-in-oil emulsion
Source: Royal Society of Chemistry journal article supplement (doi:10.1039/c6sm01648k), 2016-01-01
Supplement: c6sm01648k5.pdf [file c6sm01648k5.pdf]

## Supplementary Information

### Electrohydrodynamic behavior of droplets in an microfluidic oil-in-oil emulsion

Somayeh Khajehpour Tadavani, James R. Munroe, and Anand Yethiraj  
*Physics and Physical Oceanography,  
Memorial University of Newfoundland,  
St. John's, NL, A1B 3X7, Canada*

#### I. DROP BREAKUP AND COALESCENCE

**Breakup:** Movie 1 (left panel,  $E = 9.5 \text{ V}/\mu\text{m}$ ) shows a time series for the breakup of a large pancake-shaped drop. Breakup events can be spotted at 7.4 s, 14.6 s, and 16.9 s. Cell thickness  $d = 27 \mu\text{m}$ . The middle panel ( $E = 8.5 \text{ V}/\mu\text{m}$ ) shows the breakup a drop in a thicker ( $d = 55 \mu\text{m}$ ) cell. Here the drop is close to spherical, and breakup occurs by deformations in the plane perpendicular to the field. Breakup occurs at 3.60 s.

**Coalescence:** Movie 1 (right panel, cell thickness  $d = 96 \mu\text{m}$ ,  $E = 3.5 \text{ V}/\mu\text{m}$ ) shows a drop coalescence event. The third dimension is crucial to the coalescence event, with a drop detaching from a bounding substrate at around 0.7 s, moving above a larger drop. Both drops are oblate, so this configuration allows their flat faces to touch. Coalescence occurs at  $\approx 2.5 \text{ s}$ .

#### II. DROP DYNAMICS

Movie 2 (left panel) shows a time series for the short-time dynamics of drops for  $t < 0.9 \text{ s}$ . In this regime, the mean-square displacements are linearly dependent on time.  $d = 55 \mu\text{m}$ .  $E = 12.5 \text{ V}/\mu\text{m}$

Movie 2 (right panel) shows the long-time dynamics ( $t < 9 \text{ s}$ ) for the same sample conditions. Some directed motion is observable.

Supplementary Figure 1 shows the mean square displacements as a function of time for the thinnest cell ( $d = 27 \mu\text{m}$ ). This dependence can be fitted to a linear form for intermediate electric fields, and to  $\text{MSD} = K_1 t + K_2 t^2$  for larger electric fields. There is no motion at all for low fields. The prefactor to the quadratic term yields the advection:  $v = \sqrt{K_2}$ . Since the square of this speed is proportional to the kinetic energy, and  $E^2$  is proportional to the injected electric field energy, one would expect that  $v \propto E$ .

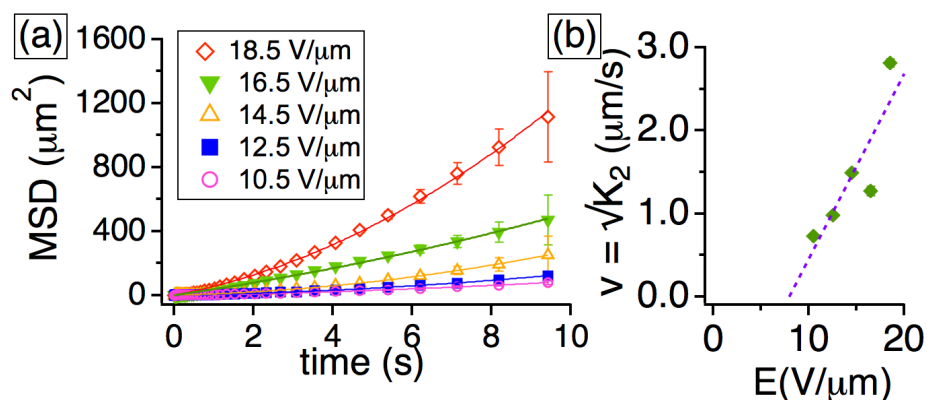

FIG. 1: **Drop Dynamics.** (a) Mean-squared displacement as a function of time shows a roughly linear dependence at intermediate fields and quadratic dependence at higher fields. (b) The advective term can be obtained from the fits in (a). A linear fit is shown.

#### III. FIELD THRESHOLDS

Two field thresholds are identified from the thickness dependence study and shown in FIG. 2. The first is the field threshold, as a function of cell thickness, where drop breakup occurs. The second is the field threshold, as a function of cell thickness, when drops are displacing and changing shape rapidly enough that particle tracking is not feasible.

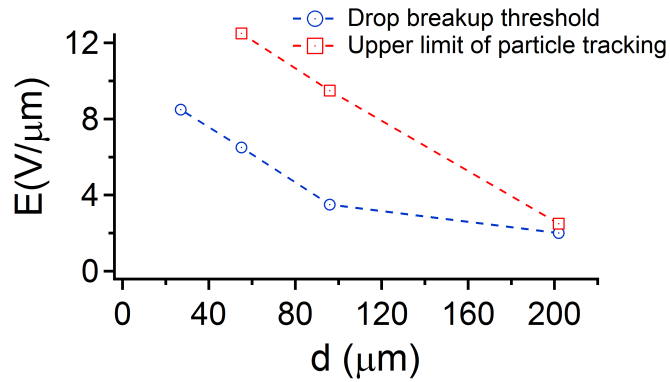

FIG. 2: **Field Thresholds.** Field thresholds for drop breakup and for vigorous drop motion (evaluated by inability to track drops) as a function of cell thickness. For the  $d = 27 \mu\text{m}$  cell, particle tracking is always possible.

#### IV. CONVECTION WITH DROPLETS AND PMMA COLLOIDS

Movie 3 shows convection of droplets (left panel,  $E = 4.5 \text{ V}/\mu\text{m}$ ) and particles (PMMA colloids, right panel,  $E = 2.4 \text{ V}/\mu\text{m}$ ) close to the instability threshold.

#### V. MIXING OF DYED AND NON-DYED CASTOR OIL IN THE PRESENCE OF THE ELECTRIC FIELD

Movie 4 shows the dynamics of the interface, obtained with time-lapse macro scale photography and white light illumination, between dyed castor oil (top) and non-dyed castor oil (bottom), without and with an applied electric field. Left panel: With  $E = 0 \text{ V}/\mu\text{m}$ , there is no distinguishable motion of the interface over a period of 3 hours. Right panel: with the field on,  $E = 8 \text{ V}/\mu\text{m}$ , rapid blurring of the interface between the dyed and non-dyed regions is observed over a time scale of  $\approx 15$  minutes.
